# Supplementary material
Source: Springer Nature journal article supplement (https://www.springermedizin.de/resource/supplementary/13012_2013_775_MOESM1_ESM.pdf/9630670)
Supplement: MOESM1 [file 9630670]

# BC Knowledge Translation Needs Assessment

## INTRODUCTION

As BC's provincial health research support agency, MSFHR is committed to supporting the use of health research evidence to improve practice and policy (knowledge translation, or KT).

**Please join your colleagues in identifying KT training and resource needs across BC.**

We're looking for input from both "producers" and "users" of health research evidence, recognizing that many of you play both roles.

The results of this survey will help us and our partners develop KT training and resources of most interest to respondents.

Please note:

- We see knowledge translation as a complex process whose components are not in practice easily - or ideally - separated. **However**, the survey asks specific questions about evidence dissemination, synthesis, exchange and application to understand needs in these specific areas as well as for KT overall.
- We also recognize that many types of evidence must be drawn on to improve health care practice and policy. **The focus of this particular survey** is health research evidence (or results of health research), recognizing its effective use relies on other types of evidence in context.

Thanks in advance for your input. We'll post a summary of the results on our web page this spring.

Use the navigation buttons in the survey. You can leave and return to your responses at a later time using the same computer and survey link. It should take approximately 15 minutes to complete. Please note: There is no identifying information collected in this survey. For more information, visit our [website](#).

## ABOUT YOU

# BC Knowledge Translation Needs Assessment

## 1. What is your primary professional role?

- Researcher
- Clinician-scientist
- Research trainee (graduate or post-graduate)
- Health care provider
- Health care administrator
- Public servant (i.e. working in government)
- Knowledge broker (i.e. intermediary between researchers and evidence users)
- Other (please specify)

## 2. What is your primary work environment?

- University/college
- Research institute (within a health authority or university)
- Not-for-profit organization
- Health authority (including hospital and community)
- Government
- Private sector
- Other (please specify)

## 3. Where is your workplace located?

- A (Northern Health geographic region)
- B (Vancouver Coastal Health geographic region)
- C (Fraser Health geographic region)
- D (Vancouver Island Health Authority geographic region)
- E (Interior Health geographic region)
- Outside BC

# BC Knowledge Translation Needs Assessment

(BC Stats, 2002)

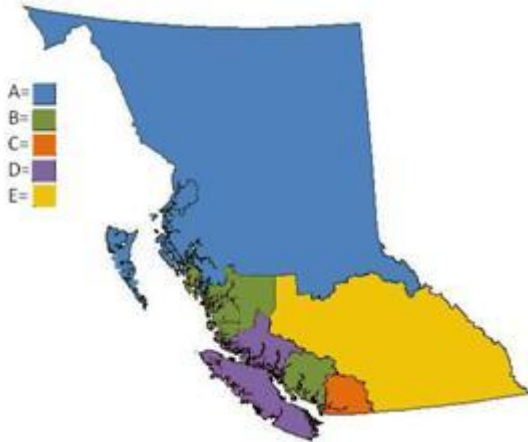

## 4. In what setting is your workplace located?

- Urban
- Rural or remote

## 5. What type of research most closely aligns with your work?

- Not applicable
- Don't know
- Biomedical research
- Clinical research
- Health services research
- Population health research
- Other type of research (please specify)

The survey is in two parts. Part I asks about your interest in learning more about KT broadly as well as specific aspects of KT. Part II asks about training experiences, preferences, and barriers to KT.

For the purposes of this survey we use the definition of knowledge translation as developed by Canadian Institutes of Health Research:

*A dynamic and iterative process that includes synthesis, dissemination, exchange and ethically-sound application of knowledge to improve the health of Canadians, provide more effective health services and products, and strengthen the health care system. This process takes place within a complex system of interactions between researchers and knowledge users which may vary in intensity, complexity and level of engagement depending on the nature of the research and the findings as well as the needs of the particular*

# BC Knowledge Translation Needs Assessment

*knowledge user.*

Other terms commonly used are knowledge transfer, knowledge exchange, research utilization, and dissemination and implementation (US).

## PART I. KNOWLEDGE TRANSLATION

**6. Indicate if you're interested in learning more about the following, and if so the level of training you need.**

*Select all that apply.*

|                                                                       | Interested<br>(beginner) | Interested<br>(intermediate) | Interested<br>(advanced) | Not interested        |
|-----------------------------------------------------------------------|--------------------------|------------------------------|--------------------------|-----------------------|
| Developing a KT plan                                                  | <input type="radio"/>    | <input type="radio"/>        | <input type="radio"/>    | <input type="radio"/> |
| Implementing a KT plan                                                | <input type="radio"/>    | <input type="radio"/>        | <input type="radio"/>    | <input type="radio"/> |
| Evaluating a KT plan                                                  | <input type="radio"/>    | <input type="radio"/>        | <input type="radio"/>    | <input type="radio"/> |
| KT models and theories                                                | <input type="radio"/>    | <input type="radio"/>        | <input type="radio"/>    | <input type="radio"/> |
| KT research (also known as dissemination and implementation research) | <input type="radio"/>    | <input type="radio"/>        | <input type="radio"/>    | <input type="radio"/> |
| Teaching KT                                                           | <input type="radio"/>    | <input type="radio"/>        | <input type="radio"/>    | <input type="radio"/> |
| Other topics of interest (please specify)                             | <input type="text"/>     |                              |                          |                       |

## DISSEMINATION

*Identifying the appropriate audience and tailoring the message and medium to the audience. Dissemination activities can include such things as summaries for/briefings to stakeholders, educational sessions, creation of tools and media engagement.*

**7. How important to your work is dissemination, as defined above?**

- Not important
- Somewhat important
- Moderately important
- Very important

# BC Knowledge Translation Needs Assessment

## 8. Indicate if you're interested in learning more about the following, and if so the level of training you need.

Select all that apply.

|                                                                                                                        | Interested<br>(beginner) | Interested<br>(intermediate) | Interested<br>(advanced) | Not interested        |
|------------------------------------------------------------------------------------------------------------------------|--------------------------|------------------------------|--------------------------|-----------------------|
| Developing a dissemination plan                                                                                        | <input type="radio"/>    | <input type="radio"/>        | <input type="radio"/>    | <input type="radio"/> |
| Implementing a dissemination plan                                                                                      | <input type="radio"/>    | <input type="radio"/>        | <input type="radio"/>    | <input type="radio"/> |
| Evaluating a dissemination plan                                                                                        | <input type="radio"/>    | <input type="radio"/>        | <input type="radio"/>    | <input type="radio"/> |
| Developing key messages                                                                                                | <input type="radio"/>    | <input type="radio"/>        | <input type="radio"/>    | <input type="radio"/> |
| Communicating using plain language (written and verbal)                                                                | <input type="radio"/>    | <input type="radio"/>        | <input type="radio"/>    | <input type="radio"/> |
| Targeting communication to specific audiences                                                                          | <input type="radio"/>    | <input type="radio"/>        | <input type="radio"/>    | <input type="radio"/> |
| Social marketing (i.e. the systematic application of marketing to achieve specific behavioral goals for a social good) | <input type="radio"/>    | <input type="radio"/>        | <input type="radio"/>    | <input type="radio"/> |
| Working with the media                                                                                                 | <input type="radio"/>    | <input type="radio"/>        | <input type="radio"/>    | <input type="radio"/> |
| Other topics of interest (please specify)                                                                              | <input type="text"/>     |                              |                          |                       |

## SYNTHESIS

*The contextualization and integration of research findings of individual research studies within the larger body of knowledge on the topic. A synthesis must be reproducible and transparent in its methods, using quantitative and/or qualitative methods. It could take the form of a systematic review, follow the methods developed by the Cochrane Collaboration, result from a consensus conference or expert panel or synthesize qualitative or quantitative results. Realist syntheses, narrative syntheses, meta-analyses, meta-syntheses and practice guidelines are all forms of synthesis.*

## 9. How important to your work is synthesis, as defined above?

- Not important
- Somewhat important
- Moderately important
- Very important

# BC Knowledge Translation Needs Assessment

## 10. Indicate if you're interested in learning more about the following, and if so the level of training you need.

Select all that apply.

|                                                                             | Interested (beginner) | Interested (intermediate) | Interested (advanced) | Not interested        |
|-----------------------------------------------------------------------------|-----------------------|---------------------------|-----------------------|-----------------------|
| Conducting evidence syntheses                                               | <input type="radio"/> | <input type="radio"/>     | <input type="radio"/> | <input type="radio"/> |
| Communicating evidence syntheses (e.g. summaries, overviews, policy briefs) | <input type="radio"/> | <input type="radio"/>     | <input type="radio"/> | <input type="radio"/> |
| Finding and appraising evidence syntheses                                   | <input type="radio"/> | <input type="radio"/>     | <input type="radio"/> | <input type="radio"/> |
| Other topics of interest (please specify)                                   | <input type="text"/>  |                           |                       |                       |

## EXCHANGE

*Interactions between the evidence user and the researcher at any or all stages of the research process. The Canadian Health Services Research Foundation (CHSRF) says that effective knowledge exchange involves interaction between knowledge users and researchers and results in mutual learning through the process of planning, producing, disseminating, and applying existing or new research in decision-making.*

## 11. How important to your work is knowledge exchange, as defined above?

- Not important
- Somewhat important
- Moderately important
- Very important

## 12. Indicate if you're interested in learning more about the following, and if so the level of training you need.

Select all that apply.

|                                                                                                                      | Interested (beginner) | Interested (intermediate) | Interested (advanced) | Not interested        |
|----------------------------------------------------------------------------------------------------------------------|-----------------------|---------------------------|-----------------------|-----------------------|
| Working with decision makers                                                                                         | <input type="radio"/> | <input type="radio"/>     | <input type="radio"/> | <input type="radio"/> |
| Working with researchers                                                                                             | <input type="radio"/> | <input type="radio"/>     | <input type="radio"/> | <input type="radio"/> |
| Working with industry                                                                                                | <input type="radio"/> | <input type="radio"/>     | <input type="radio"/> | <input type="radio"/> |
| How decisions are made in health care environments                                                                   | <input type="radio"/> | <input type="radio"/>     | <input type="radio"/> | <input type="radio"/> |
| How decisions are made in government environments                                                                    | <input type="radio"/> | <input type="radio"/>     | <input type="radio"/> | <input type="radio"/> |
| Using social media or web-based tools for knowledge exchange (e.g. web-based forums, wikis, social networking sites) | <input type="radio"/> | <input type="radio"/>     | <input type="radio"/> | <input type="radio"/> |
| Other topics of interest (please specify)                                                                            | <input type="text"/>  |                           |                       |                       |

# BC Knowledge Translation Needs Assessment

## APPLICATION

*The iterative process by which new or existing health research evidence is put into practice. Application can refer to both the integration of evidence into existing programs, policies or practices, or the development of new evidence-informed programs, policies, practices, products and services.*

### 13. How important to your work is application, as defined above?

- Not important
- Somewhat important
- Moderately important
- Very important

### 14. Indicate if you're interested in learning more about the following, and if so the level of training you need.

*Select all that apply.*

|                                                                           | Interested<br>(beginner) | Interested<br>(intermediate) | Interested<br>(advanced) | Not interested        |
|---------------------------------------------------------------------------|--------------------------|------------------------------|--------------------------|-----------------------|
| Developing evidence-informed practices and programs                       | <input type="radio"/>    | <input type="radio"/>        | <input type="radio"/>    | <input type="radio"/> |
| Implementing evidence-informed practices and programs                     | <input type="radio"/>    | <input type="radio"/>        | <input type="radio"/>    | <input type="radio"/> |
| Sustaining evidence-informed practices and programs                       | <input type="radio"/>    | <input type="radio"/>        | <input type="radio"/>    | <input type="radio"/> |
| Evaluating the implementation of evidence-informed practices and programs | <input type="radio"/>    | <input type="radio"/>        | <input type="radio"/>    | <input type="radio"/> |
| KT related to the commercialization of products or services               | <input type="radio"/>    | <input type="radio"/>        | <input type="radio"/>    | <input type="radio"/> |

Other topics of interest (please specify)

## PART II. KT SUPPORT

*KT support includes learning resources, advice, training activities, funding, etc.*

# BC Knowledge Translation Needs Assessment

## 15. Please rate your level of agreement with the following.

*In my work environment, the KT support available is generally:*

|                        | Strongly disagree     | Disagree              | Somewhat disagree     | Somewhat agree        | Agree                 | Strongly agree        | Don't know            |
|------------------------|-----------------------|-----------------------|-----------------------|-----------------------|-----------------------|-----------------------|-----------------------|
| Accessible             | <input type="radio"/> | <input type="radio"/> | <input type="radio"/> | <input type="radio"/> | <input type="radio"/> | <input type="radio"/> | <input type="radio"/> |
| Affordable             | <input type="radio"/> | <input type="radio"/> | <input type="radio"/> | <input type="radio"/> | <input type="radio"/> | <input type="radio"/> | <input type="radio"/> |
| Relevant               | <input type="radio"/> | <input type="radio"/> | <input type="radio"/> | <input type="radio"/> | <input type="radio"/> | <input type="radio"/> | <input type="radio"/> |
| Interesting            | <input type="radio"/> | <input type="radio"/> | <input type="radio"/> | <input type="radio"/> | <input type="radio"/> | <input type="radio"/> | <input type="radio"/> |
| Of high quality        | <input type="radio"/> | <input type="radio"/> | <input type="radio"/> | <input type="radio"/> | <input type="radio"/> | <input type="radio"/> | <input type="radio"/> |
| Of a sufficient amount | <input type="radio"/> | <input type="radio"/> | <input type="radio"/> | <input type="radio"/> | <input type="radio"/> | <input type="radio"/> | <input type="radio"/> |

## 16. List up to five of the most useful KT resources and activities you have used or heard of.

## 17. List up to three KT skills trainers (based in Western Canada) you would recommend to lead a KT workshop.

## KT SUPPORT: PREFERENCES

### 18. How do you prefer to learn about a topic?

*Select up to two.*

- Self-guided study (e.g. reading, video, etc.)
- Large group sessions (e.g. seminars, conferences, community of practice)
- Small group sessions (e.g. workshops, seminars)
- One-on-one
- Teleconferences and webinars
- Other (please specify)



# BC Knowledge Translation Needs Assessment

## 19. What is the likelihood that you would engage in the following?

|                                                                                                                                 | Very unlikely         | Unlikely              | Somewhat unlikely     | Somewhat likely       | Likely                | Very likely           | Don't know            |
|---------------------------------------------------------------------------------------------------------------------------------|-----------------------|-----------------------|-----------------------|-----------------------|-----------------------|-----------------------|-----------------------|
| Attend a KT workshop                                                                                                            | <input type="radio"/> | <input type="radio"/> | <input type="radio"/> | <input type="radio"/> | <input type="radio"/> | <input type="radio"/> | <input type="radio"/> |
| Take brief, free web-based KT training with local and international mentors and peers                                           | <input type="radio"/> | <input type="radio"/> | <input type="radio"/> | <input type="radio"/> | <input type="radio"/> | <input type="radio"/> | <input type="radio"/> |
| Study for and obtain free web-based KT training with local and international mentors and peers that would lead to a certificate | <input type="radio"/> | <input type="radio"/> | <input type="radio"/> | <input type="radio"/> | <input type="radio"/> | <input type="radio"/> | <input type="radio"/> |
| Access online KT resources (e.g. KT models, tools and best practice information)                                                | <input type="radio"/> | <input type="radio"/> | <input type="radio"/> | <input type="radio"/> | <input type="radio"/> | <input type="radio"/> | <input type="radio"/> |
| Join a KT community of practice/network                                                                                         | <input type="radio"/> | <input type="radio"/> | <input type="radio"/> | <input type="radio"/> | <input type="radio"/> | <input type="radio"/> | <input type="radio"/> |
| Work with a KT mentor                                                                                                           | <input type="radio"/> | <input type="radio"/> | <input type="radio"/> | <input type="radio"/> | <input type="radio"/> | <input type="radio"/> | <input type="radio"/> |
| Seek KT advice (e.g. call a help desk)                                                                                          | <input type="radio"/> | <input type="radio"/> | <input type="radio"/> | <input type="radio"/> | <input type="radio"/> | <input type="radio"/> | <input type="radio"/> |
| Apply for KT funding                                                                                                            | <input type="radio"/> | <input type="radio"/> | <input type="radio"/> | <input type="radio"/> | <input type="radio"/> | <input type="radio"/> | <input type="radio"/> |
| Other (please specify)                                                                                                          | <input type="text"/>  |                       |                       |                       |                       |                       |                       |

## 20. How much of the following do you receive at your place of work to participate in a KT training workshop?

|                   | No support            | Some support          | Full support          | Not sure              |
|-------------------|-----------------------|-----------------------|-----------------------|-----------------------|
| Encouragement     | <input type="radio"/> | <input type="radio"/> | <input type="radio"/> | <input type="radio"/> |
| Time              | <input type="radio"/> | <input type="radio"/> | <input type="radio"/> | <input type="radio"/> |
| Registration fees | <input type="radio"/> | <input type="radio"/> | <input type="radio"/> | <input type="radio"/> |
| Travel costs      | <input type="radio"/> | <input type="radio"/> | <input type="radio"/> | <input type="radio"/> |

## 21. What would prevent your participation in a KT training workshop?

Select all that apply.

- Multi-day time commitment
- Registration fees
- Location
- Travel costs
- Lack of commitment from employer
- Nothing would prevent me from participating.

Other (please specify)

# BC Knowledge Translation Needs Assessment

## 22. How much would you/your employer be willing to pay in registration fees so you could attend a:

|                                           | \$0 - Only if it was free | Up to \$200           | Up to \$600           | Up to \$1000          | Up to \$1600          | I would not attend    |
|-------------------------------------------|---------------------------|-----------------------|-----------------------|-----------------------|-----------------------|-----------------------|
| 1-day training workshop?                  | <input type="radio"/>     | <input type="radio"/> | <input type="radio"/> | <input type="radio"/> | <input type="radio"/> | <input type="radio"/> |
| 2-day training workshop?                  | <input type="radio"/>     | <input type="radio"/> | <input type="radio"/> | <input type="radio"/> | <input type="radio"/> | <input type="radio"/> |
| 3-day training workshop?                  | <input type="radio"/>     | <input type="radio"/> | <input type="radio"/> | <input type="radio"/> | <input type="radio"/> | <input type="radio"/> |
| 5-day KT professional certificate course? | <input type="radio"/>     | <input type="radio"/> | <input type="radio"/> | <input type="radio"/> | <input type="radio"/> | <input type="radio"/> |

## BARRIERS

## 23. On a scale from one to five, how much of a barrier is each of the following to doing KT in your work?

|                                                               | 1 = not a barrier     | 2                     | 3                     | 4                     | 5 = a major barrier   | Not applicable        |
|---------------------------------------------------------------|-----------------------|-----------------------|-----------------------|-----------------------|-----------------------|-----------------------|
| KT skills of staff                                            | <input type="radio"/> | <input type="radio"/> | <input type="radio"/> | <input type="radio"/> | <input type="radio"/> | <input type="radio"/> |
| Time/competing priorities                                     | <input type="radio"/> | <input type="radio"/> | <input type="radio"/> | <input type="radio"/> | <input type="radio"/> | <input type="radio"/> |
| Formal recognition from employer                              | <input type="radio"/> | <input type="radio"/> | <input type="radio"/> | <input type="radio"/> | <input type="radio"/> | <input type="radio"/> |
| Organizational culture                                        | <input type="radio"/> | <input type="radio"/> | <input type="radio"/> | <input type="radio"/> | <input type="radio"/> | <input type="radio"/> |
| Opportunities to interact with researchers and evidence users | <input type="radio"/> | <input type="radio"/> | <input type="radio"/> | <input type="radio"/> | <input type="radio"/> | <input type="radio"/> |
| Funding for KT activities                                     | <input type="radio"/> | <input type="radio"/> | <input type="radio"/> | <input type="radio"/> | <input type="radio"/> | <input type="radio"/> |
| Access to KT resources                                        | <input type="radio"/> | <input type="radio"/> | <input type="radio"/> | <input type="radio"/> | <input type="radio"/> | <input type="radio"/> |

Other (please specify)

## 24. What else do you require in your work environment to better support KT in your work?

## THANK YOU

## Do you have any additional comments regarding your needs or preferences related to KT?

## BC Knowledge Translation Needs Assessment

Thank you for your input!

Please click the button below to submit your survey.

For more information about this survey or MSFHR's knowledge translation activities, visit our [website](#) or contact [Gayle Scarrow](#), Knowledge Translation Manager.
